# Supplementary material for: Quantitative analysis of receptor-mediated uptake and pro-apoptotic activity of mistletoe lectin-1 by high content imaging
Source: PubMed Central journal article supplement (PMC5807326; doi:10.1038/s41598-018-20915-y), 2018-02-09
Supplement: 41598_2018_20915_MOESM1_ESM.pdf [file 41598_2018_20915_MOESM1_ESM.pdf]

Supplementary information

**Quantitative analysis of receptor-mediated uptake and pro-apoptotic activity of mistletoe lectin-1 by high content imaging**

Beztsinna N.<sup>1</sup>, de Matos M.B.C.<sup>1,2</sup>, Walther J.<sup>1</sup>, Heyder C.<sup>2</sup>, Hildebrandt, E.<sup>2,3</sup>, Leneweit G.<sup>2</sup>, Mastrobattista E.<sup>1</sup>, Kok R.J.<sup>1\*</sup>

<sup>1</sup>*Department of Pharmaceutics, Utrecht Institute for Pharmaceutical Sciences, Utrecht University, The Netherlands*

<sup>2</sup>*ABNOBA GmbH, Pforzheim, Germany*

<sup>3</sup>*Institute for Mechanical Engineering and Mechanics, Karlsruhe Institute of Technology, Karlsruhe, Germany*

\*corresponding author, [r.j.kok@uu.nl](mailto:r.j.kok@uu.nl)

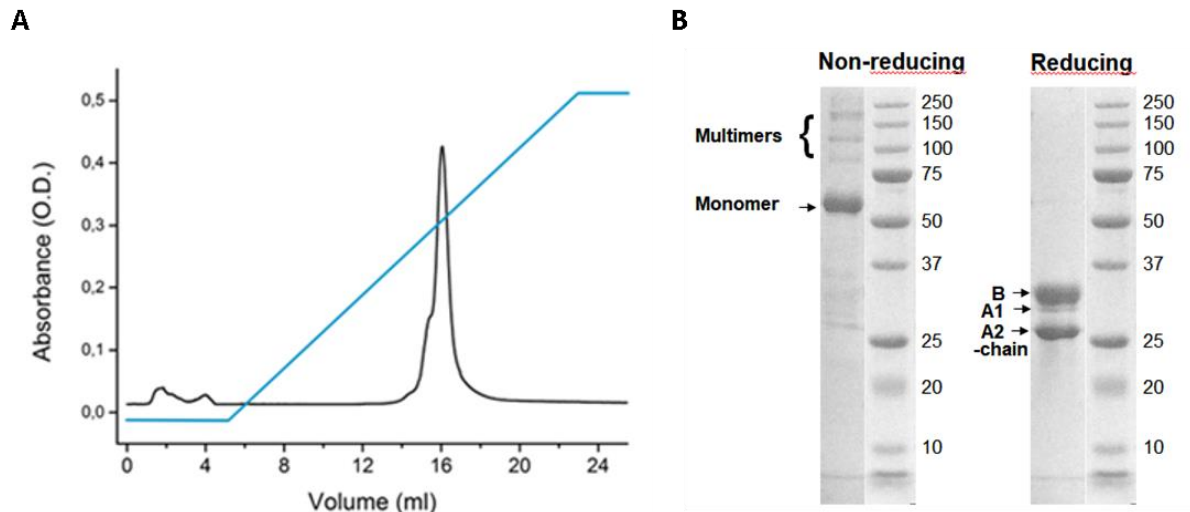

Figure S1 A. FPLC elution profile for ML1 (0.6M NaCl gradient). The main peak represents purified ML1 cytotoxin, with a small left shoulder comprising the variant (A1) of the apoptotic A chain typical for winter mistletoe harvest. B. SDS-PAGE analysis of ML1 under non-reducing and reducing conditions. Monomer ML-1 and multimers of ML-1 are observed under non-reducing conditions. Disruption of disulfide bonds under reducing SDS-PAGE conditions separates the covalently linked A and B chain of ML-1 into 26 kDa and 30 kDa fragments, respectively. A third band was detected at 29 kDa, which is a variant (A1) of the A chain found in winter harvests of the mistletoe plant.

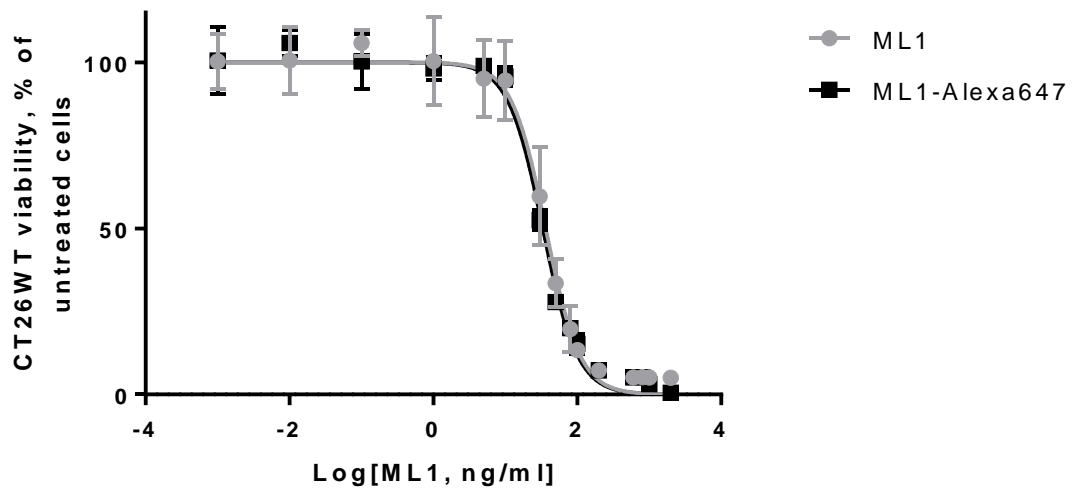

Figure S2. Comparative cytotoxicity of native and Alexa Fluor 647 labeled ML1. Respective IC50 values are 36,6 and 33,2 ng/mL.

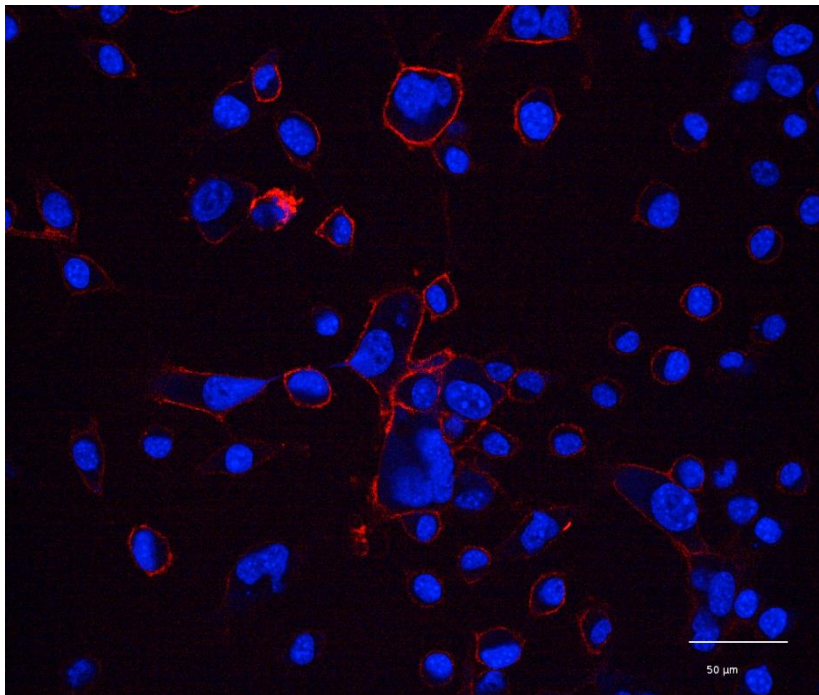

Figure S3. Confocal image of CT26 cells incubated with ML1 at 4°C for 1h (10 µg/mL). Nuclei are stained in blue; size bar – 50 µm.

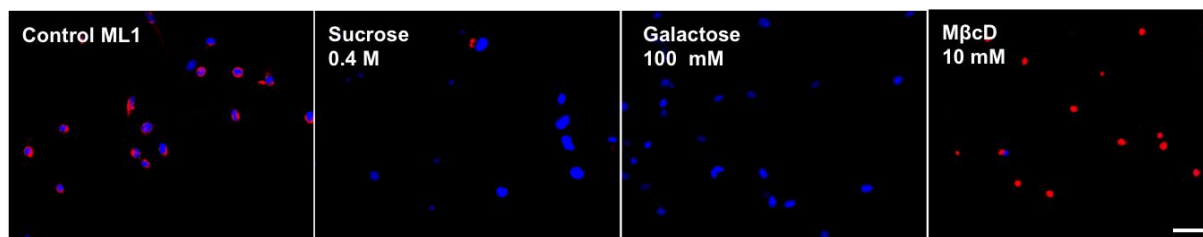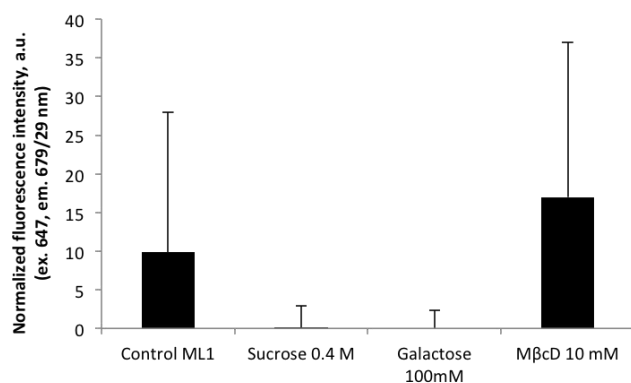

Figure S4. Confocal images of CT26 cells pre-incubated with uptake inhibitors and then incubated with ML1 for 2h (10  $\mu\text{g}/\text{mL}$ ) (up); Average ML1 fluorescence (n=4) in the cells quantified with Columbus suite software and normalized by subtraction of baseline cell fluorescence; nuclei are stained in blue, ML1 – red; size bar 50  $\mu\text{m}$ .

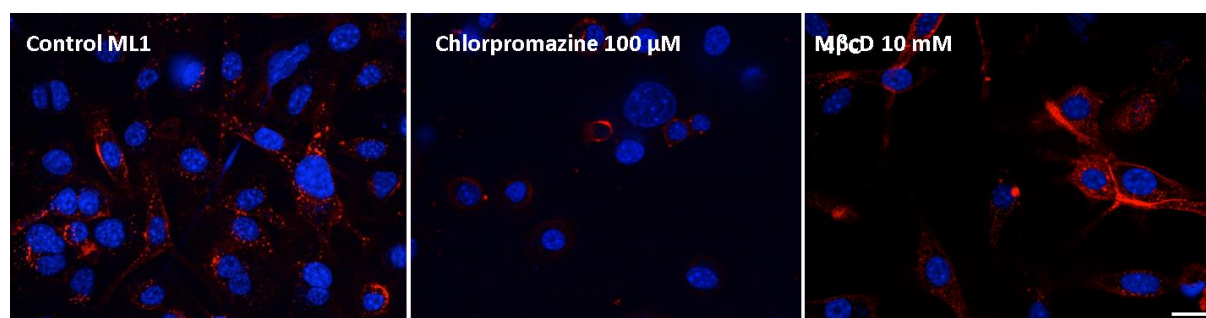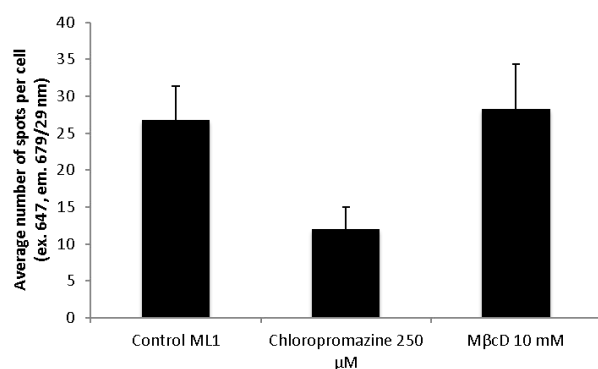

Figure S5. Confocal images of CT26 cells pre-incubated with uptake inhibitors and then incubated with ML1 for 1h (10  $\mu\text{g}/\text{mL}$ ) (up); Average number of spots per cell (n=3) quantified with Columbus suite software; nuclei are stained in blue, ML1 – red; size bar 20  $\mu\text{m}$ .

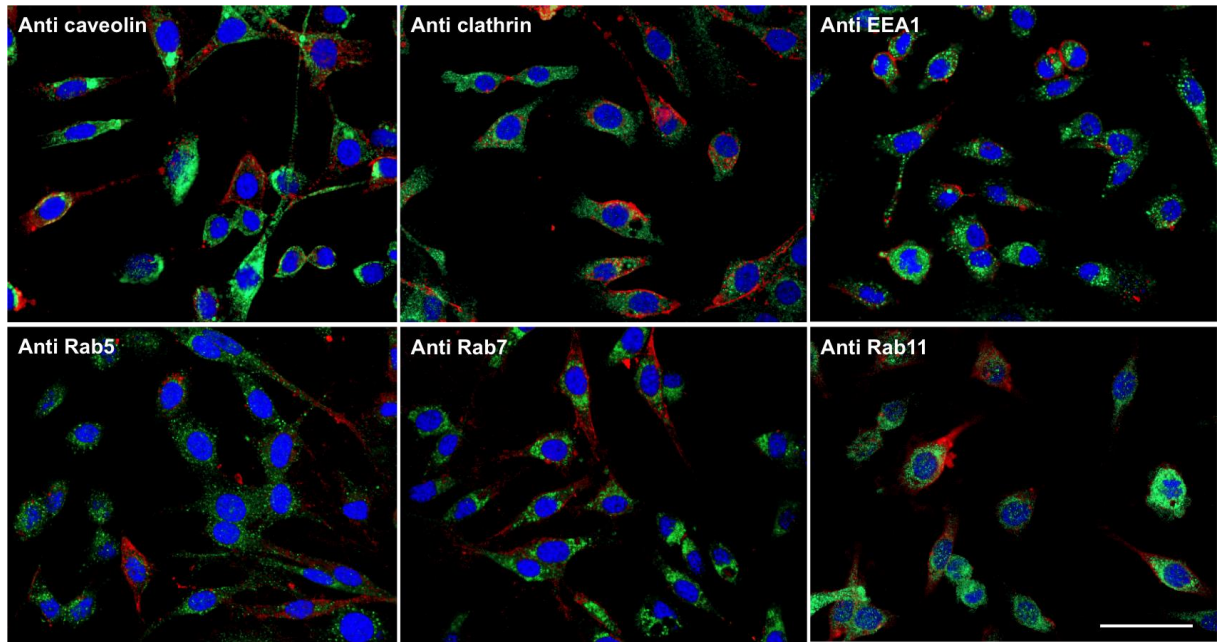

Figure S6. Confocal images of ML1 uptake (10  $\mu\text{g}/\text{mL}$ , 2h) and co-staining with endolysosomal pathway specific antibodies; nuclei are stained in blue, ML1 - red, secondary antibody (Anti-Goat conjugated to Alexa Fluor 488) - green; size bar 50  $\mu\text{m}$ .

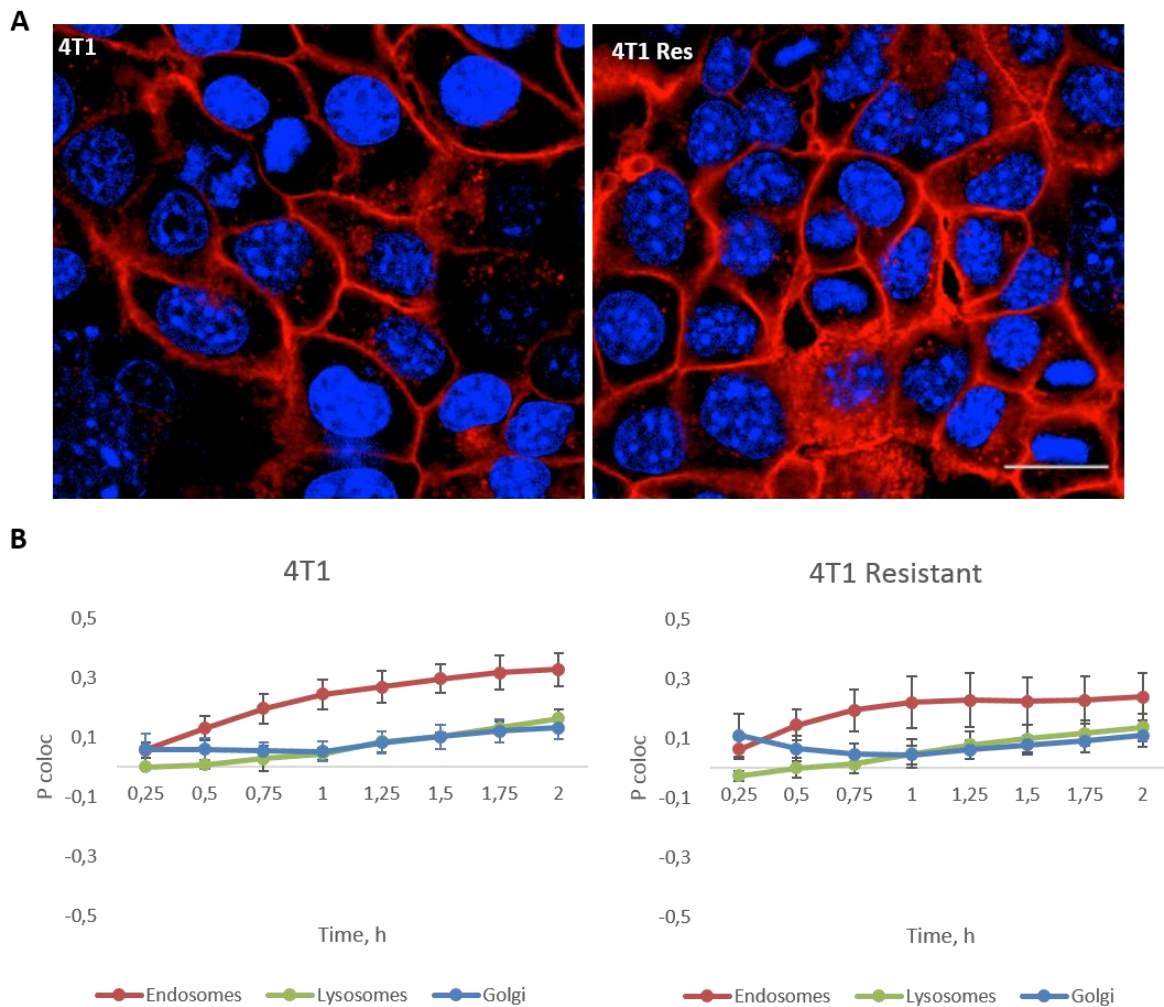

Figure S7. A. Confocal images of ML1 uptake in 4T1 control and doxorubicin resistant cells at 30 min incubation with 10  $\mu\text{g}/\text{mL}$  ML1; nuclei are stained in blue, ML1 – red; size bar 20  $\mu\text{m}$ .; B. Pearson correlation coefficient dynamics of co-localization ML1 with endosomes, lysosomes and Golgi in 4T1 mother and resistant cells.

### Supplementary movies:

**1 and 2:** Time-lapse movies of ML1 induced apoptosis in CT26 cells (1) or untreated CT26 cells in the same experiment (2); nuclei are stained in blue, apoptotic cells in green (CellEvent® live staining), ML1 in red, magnification 60x. The first 8 frames of each movie are taken every 15 min for 2h and the rest 24 frames every 3 hours up to 72h.

**3 and 4:** Time-lapse movies of ML1 induced apoptosis in 4T1 Res cells (3) or untreated 4T1 Res cells in the same experiment (2); nuclei are stained in blue, apoptotic cells in green (CellEvent® live staining), ML1 in red, magnification 40x. In total 18 frames are taken with imaging every 4 hours up to 72h.

**Table S1.** Summary of fluorescent labels used for various experiments with living or fixed cells.

| <b>Target</b>                       | <b>Live-cell experiments*</b>                     | <b>Fixed cells experiments</b>                |
|-------------------------------------|---------------------------------------------------|-----------------------------------------------|
| Nuclei                              | Hoechst 33342                                     | Hoechst 33342                                 |
| Lysosomes                           | LysoTracker Green                                 | Anti-Rab11†                                   |
| Golgi                               | BODIPY TR C5 -ceramide complexed to BSA           | -                                             |
| Endosomes early                     | pHrodo Green Dextran conjugate                    | Anti-EEA1, Anti-Rab5                          |
| Endosomes late                      | -                                                 | Anti-Rab7                                     |
| Cell membrane/<br>protein transport | Wheat Germ Agglutinin Oregon Green conjugate      | -                                             |
| Caveolin-mediated uptake            | Cholera toxin subunit b Alexa Fluor 488 conjugate | Anti-caveolin                                 |
| Clathrin-mediated uptake            | -                                                 | Anti-clathrin                                 |
| Apoptotic cells                     | CellEvent caspase-3/7 Green Detection Reagent     | CellEvent caspase-3/7 Green Detection Reagent |

\* All live cell labeling reagents and fluorescent dyes were purchased from Thermo Fisher Scientific, Naarden, The Netherlands.

† Endosomal Marker Antibody Sampler Kit #12666 was purchased from Cell Signaling Technology Europe, B.V., Leiden, The Netherlands.
